# Supplementary material for: Tetracoordinate Co(ii) complexes containing bathocuproine and single molecule magnetism
Source: Royal Society of Chemistry journal article supplement (doi:10.1039/c6nj00372a), 2016-01-01
Supplement: c6nj00372a1.pdf [file c6nj00372a1.pdf]

## Electronic Supplementary Information

### Elemental analyses (Elementar vario MICRO cube Elemental Analyzer, silver boats)

calc. (found) for **1** (C<sub>26</sub>H<sub>20</sub>N<sub>2</sub>CoCl<sub>2</sub>, M<sub>r</sub> = 490.29): 63.69 (63.71) % C, 5.71 (5.75) % N, 4.11 (4.18) % H; **2** (C<sub>26</sub>H<sub>20</sub>N<sub>2</sub>CoBr<sub>2</sub>, M<sub>r</sub> = 579.19): 53.92 (53.48) % C, 4.84 (4.88) % N, 3.48 (3.61) % H; **3** (C<sub>26</sub>H<sub>20</sub>N<sub>2</sub>CoI<sub>2</sub>, M<sub>r</sub> = 673.19): 46.39 (45.98) % C, 4.16 (4.15) % N, 2.99 (3.02) % H.

**FT-IR** (Nicolet 6700 FT-IR Spectrometer with SmartOrbit™ diamond ATR accessory in the range of 4000–400 cm<sup>-1</sup>)

**1**: 3075(w), 3055(w), 3026(w), 2997(w), 2951(w), 2910(w), 2827(w), 1614(m), 1597(w), 1581(w), 1567(m), 1549(m), 1506(w), 1486(m), 1434(m), 1404(w), 1393(m), 1375(m), 1319(w), 1306(w), 1281(w), 1266(w), 1232(w), 1200(w), 1177(w), 1160(m), 1106(m), 1078(m), 1028(m), 999(m), 931(w), 910(w), 887(m), 861(m), 843(m), 777(s), 766(m), 738(s), 704(vs), 667(m), 635(m), 612(w), 573(m), 545(m), 523(w), 494(w), 476(w), 456(m), 446(m), 413(w).

**2**: 3070(w), 3055(w), 3030(w), 2997(w), 2951(w), 2911(w), 2835(w), 1614(m), 1596(w), 1581(w), 1567(m), 1548(m), 1507(w), 1486(m), 1434(m), 1404(w), 1392(m), 1374(m), 1319(w), 1306(w), 1282(w), 1266(w), 1232(w), 1200(w), 1177(w), 1160(m), 1106(m), 1078(m), 1028(m), 998(m), 932(w), 911(w), 888(m), 860(m), 842(m), 777(s), 765(m), 737(s), 704(vs), 667(m), 635(m), 612(w), 573(m), 545(m), 523(w), 493(w), 476(w), 456(m), 446(m), 413(w).

**3**: 3070(w), 3055(w), 3030(w), 2997(w), 2951(w), 2910(w), 2835(w), 1614(m), 1596(w), 1581(w), 1567(m), 1548(m), 1507(w), 1486(m), 1434(m), 1404(w), 1392(m), 1374(m), 1319(w), 1306(w), 1282(w), 1266(w), 1232(w), 1200(w), 1177(w), 1160(m), 1106(m), 1078(m), 1028(m), 998(m), 932(w), 911(w), 888(m), 860(m), 842(m), 777(s), 765(m), 737(s), 704(vs), 667(m), 635(m), 612(w), 573(m), 545(m), 523(w), 493(w), 476(w), 456(m), 446(m), 413(w).

**Single-crystal X-ray structure analyses** (Oxford Diffraction Gemini equipped with Atlas S2 CCD detector)

The multi-scan empirical method<sup>1</sup> was used for absorption correction of **1**, while the analytical method<sup>2</sup> was used for absorption corrections of **2** and **3**. The final refinement parameters of **2** are less satisfactory (See Table S1 bellow) as a result of crystal twinning of the sample.

<sup>1</sup> Blessing, R. H. *Acta Cryst. A.* **1995**, 51, 33-38.

<sup>2</sup> Clark, R. C., Reid, J. S. *Acta Cryst. A.* **1995**, 51, 887-897.

**Table S1** Crystal data and final refinement parameters for **1-3**

|                                             | <b>1</b>                                                         | <b>2</b>                                                         | <b>3</b>                                                        |
|---------------------------------------------|------------------------------------------------------------------|------------------------------------------------------------------|-----------------------------------------------------------------|
| Empirical formula                           | C <sub>26</sub> H <sub>20</sub> N <sub>2</sub> CoCl <sub>2</sub> | C <sub>26</sub> H <sub>20</sub> N <sub>2</sub> CoBr <sub>2</sub> | C <sub>26</sub> H <sub>20</sub> N <sub>2</sub> CoI <sub>2</sub> |
| Formula weight M <sub>r</sub>               | 490.3                                                            | 579.2                                                            | 673.2                                                           |
| Temperature [K]                             | 120                                                              | 120                                                              | 120                                                             |
| Wavelength [Å]                              | 1.54184                                                          | 1.54184                                                          | 1.54184                                                         |
| Crystal system                              | Monoclinic                                                       | Monoclinic                                                       | Monoclinic                                                      |
| Space group                                 | <i>P</i> 2 <sub>1</sub> / <i>c</i>                               | <i>P</i> 2 <sub>1</sub> / <i>c</i>                               | <i>P</i> 2 <sub>1</sub> / <i>c</i>                              |
| Unit cell dimensions                        |                                                                  |                                                                  |                                                                 |
| <i>a</i> [Å]                                | 12.9207(2)                                                       | 12.9571(4)                                                       | 12.7126(3)                                                      |
| <i>b</i> [Å]                                | 22.2792(7)                                                       | 22.7711(11)                                                      | 23.7131(7)                                                      |
| <i>c</i> [Å]                                | 7.8597(4)                                                        | 7.8738(7)                                                        | 8.0118(4)                                                       |
| $\beta$ [°]                                 | 102.627(3)                                                       | 103.018(4)                                                       | 98.626(3)                                                       |
| Volume [Å <sup>3</sup> ]                    | 2207.79(14)                                                      | 2263.4(2)                                                        | 2387.88(15)                                                     |
| <i>Z</i>                                    | 4                                                                | 4                                                                | 4                                                               |
| Density (calculated) [g/cm <sup>3</sup> ]   | 1.475                                                            | 1.699                                                            | 1.873                                                           |
| Absorption coefficient [mm <sup>-1</sup> ]  | 8.439                                                            | 10.196                                                           | 26.048                                                          |
| Crystal dimensions [mm]                     | 0.44×0.12×0.04                                                   | 0.26×0.14×0.03                                                   | 0.53×0.05×0.03                                                  |
| $\theta$ range for data collection [°]      | 3.51 – 67.07                                                     | 3.50 – 66.96                                                     | 3.52 – 66.99                                                    |
| Reflections collected                       | 14675                                                            | 14673                                                            | 18588                                                           |
| Independent reflections                     | 3901                                                             | 3984                                                             | 4202                                                            |
| <i>R</i> (int)                              | 0.0465                                                           | 0.0734                                                           | 0.0477                                                          |
| Completeness to $\theta_{\max}$ [%]         | 0.99                                                             | 0.99                                                             | 0.98                                                            |
| Max. and min. transmission                  | 0.379; 1.000                                                     | 0.256; 0.789                                                     | 0.058; 0.526                                                    |
| Data / restraints / parameters              | 3901 / 0 / 280                                                   | 3984 / 0 / 281                                                   | 4202 / 0 / 280                                                  |
| Final <i>R</i> indices [ $I > 2\sigma(I)$ ] |                                                                  |                                                                  |                                                                 |
| <i>R</i> 1                                  | 0.0341                                                           | 0.0588                                                           | 0.0301                                                          |
| <i>wR</i> 2                                 | 0.0882                                                           | 0.1401                                                           | 0.0779                                                          |
| Final <i>R</i> indices (all data)           |                                                                  |                                                                  |                                                                 |
| <i>R</i> 1                                  | 0.0385                                                           | 0.0707                                                           | 0.0408                                                          |
| <i>wR</i> 2                                 | 0.0920                                                           | 0.1478                                                           | 0.0866                                                          |

**Table S2** Selected geometric parameters [Å, °] for **1-3**

|           | <b>1 (X = Cl)</b> | <b>2 (X = Br)</b> | <b>3 (X = I)</b> |
|-----------|-------------------|-------------------|------------------|
| Co1–N1    | 2.0370(17)        | 2.036(5)          | 2.029(3)         |
| Co1–N2    | 2.0373(17)        | 2.042(5)          | 2.031(3)         |
| Co1–X1    | 2.2112(8)         | 2.3299(14)        | 2.5248(8)        |
| Co1–X2    | 2.2115(7)         | 2.3315(13)        | 2.5237(8)        |
| N1–Co1–N2 | 81.64(7)          | 81.86(19)         | 82.13(13)        |
| X1–Co1–X2 | 119.99(3)         | 120.77(5)         | 121.69(3)        |
| N1–Co1–X1 | 113.59(6)         | 112.43(15)        | 111.30(11)       |
| N1–Co1–X2 | 112.07(6)         | 112.07(16)        | 112.24(11)       |
| N2–Co1–X1 | 109.61(6)         | 109.33(16)        | 107.99(11)       |
| N2–Co1–X2 | 113.67(5)         | 113.86(15)        | 114.65(10)       |

**Table S3** Possible  $\pi$ - $\pi$  interactions [ $\text{\AA}$ ,  $^\circ$ ] for **1-3**

| Compound | $d(\text{Cg1}\cdots\text{Cg1}^i)^*$ | $\alpha$ | $\beta$ | $\gamma$ |
|----------|-------------------------------------|----------|---------|----------|
| <b>1</b> | 3.935(1)                            | 20       | 13.4    | 17.1     |
| <b>2</b> | 3.941(3)                            | 20       | 12.6    | 16.5     |
| <b>3</b> | 4.006(4)                            | 21       | 18.4    | 17.1     |

Symmetry code: (i)  $x, 0.5 - y, -0.5 + z$ 

\*Cg1 represents the centroid of the aromatic ring containing C5 atom

 $\alpha$  denotes the dihedral angle between planes I (plane of the first ring) and J (plane of the second ring); $\beta$  denotes the angle between the  $\text{Cg(I)}\cdots\text{Cg(J)}$  vector and normal to plane I; $\gamma$  denotes the angle between the  $\text{Cg(I)}\cdots\text{Cg(J)}$  vector and normal to plane J.**Table S4** The shortest  $\text{C}\cdots\text{C}$  contacts [ $\text{\AA}$ ] between aromatic C atoms of adjacent complex molecules for **1-3**

|                                | <b>1</b>                    | <b>2</b>                    | <b>3</b>                    |
|--------------------------------|-----------------------------|-----------------------------|-----------------------------|
| $\text{C(I)}\cdots\text{C(J)}$ | $d(\text{C}\cdots\text{C})$ | $d(\text{C}\cdots\text{C})$ | $d(\text{C}\cdots\text{C})$ |
| $\text{C5}\cdots\text{C12}^i$  | 3.488(3)                    | 3.500(8)                    | 3.600(6)                    |
| $\text{C6}\cdots\text{C11}^i$  | 3.494(3)                    | 3.501(8)                    | 3.558(6)                    |
| $\text{C5}\cdots\text{C11}^i$  | 3.542(3)                    | 3.553(9)                    | 3.461(6)                    |

Symmetry code: (i)  $x, 0.5 - y, -0.5 + z$ **Table S5** Possible  $\text{C-H}\cdots\text{Cl}$  weak hydrogen bonding interactions [ $\text{\AA}$ ,  $^\circ$ ] for **1**

| $\text{D-H}\cdots\text{A}$                                        | $d(\text{D-H})$ | $d(\text{H}\cdots\text{A})$ | $d(\text{D}\cdots\text{A})$ | $\angle(\text{DHA})$ |
|-------------------------------------------------------------------|-----------------|-----------------------------|-----------------------------|----------------------|
| $\text{C18}^{\text{ii}}\text{-H18}^{\text{ii}}\cdots\text{Cl1}$   | 0.96            | 2.88                        | 3.554(2)                    | 129                  |
| $\text{C23}^{\text{iii}}\text{-H23}^{\text{iii}}\cdots\text{Cl2}$ | 0.96            | 2.86                        | 3.688(2)                    | 146                  |

Symmetry codes: (ii)  $1 - x, -0.5 + y, 0.5 - z$ ; (iii)  $2 - x, -0.5 + y, 1.5 - z$ **Table S6** Possible  $\text{C-H}\cdots\text{Br}$  weak hydrogen bonding interactions [ $\text{\AA}$ ,  $^\circ$ ] for **2**

| $\text{D-H}\cdots\text{A}$                                        | $d(\text{D-H})$ | $d(\text{H}\cdots\text{A})$ | $d(\text{D}\cdots\text{A})$ | $\angle(\text{DHA})$ |
|-------------------------------------------------------------------|-----------------|-----------------------------|-----------------------------|----------------------|
| $\text{C23}^{\text{iv}}\text{-H23}^{\text{iv}}\cdots\text{Br1}$   | 0.96            | 2.96                        | 3.592(7)                    | 124                  |
| $\text{C23}^{\text{iii}}\text{-H23}^{\text{iii}}\cdots\text{Br2}$ | 0.96            | 2.94                        | 3.790(7)                    | 149                  |

Symmetry codes: (iii)  $2 - x, -0.5 + y, 1.5 - z$ ; (iv)  $2 - x, -0.5 + y, 0.5 - z$ **Table S7** Possible  $\text{C-H}\cdots\text{I}$  weak hydrogen bonding interactions [ $\text{\AA}$ ,  $^\circ$ ] for **3**

| $\text{D-H}\cdots\text{A}$                                       | $d(\text{D-H})$ | $d(\text{H}\cdots\text{A})$ | $d(\text{D}\cdots\text{A})$ | $\angle(\text{DHA})$ |
|------------------------------------------------------------------|-----------------|-----------------------------|-----------------------------|----------------------|
| $\text{C17}^{\text{iv}}\text{-H17}^{\text{iv}}\cdots\text{I1}$   | 0.96            | 3.11                        | 4.016(5)                    | 158                  |
| $\text{C18}^{\text{iii}}\text{-H18}^{\text{iii}}\cdots\text{I2}$ | 0.96            | 3.16                        | 3.921(5)                    | 138                  |

Symmetry codes: (iii)  $2 - x, -0.5 + y, 1.5 - z$ ; (iv)  $2 - x, -0.5 + y, 0.5 - z$

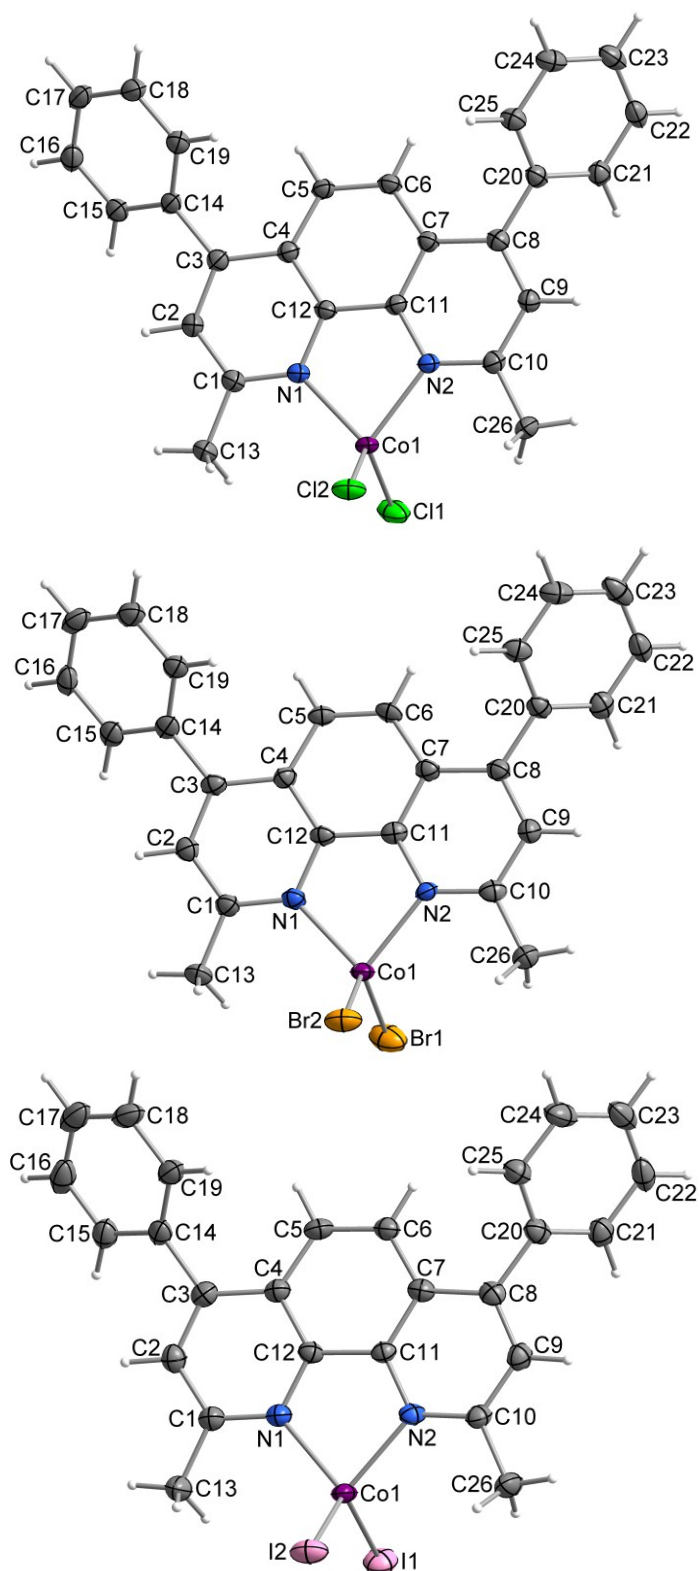

**Fig. S1** Thermal ellipsoid plots of **1-3** (from top) showing the atom numbering scheme. The ellipsoids are drawn at 50 % probability level.

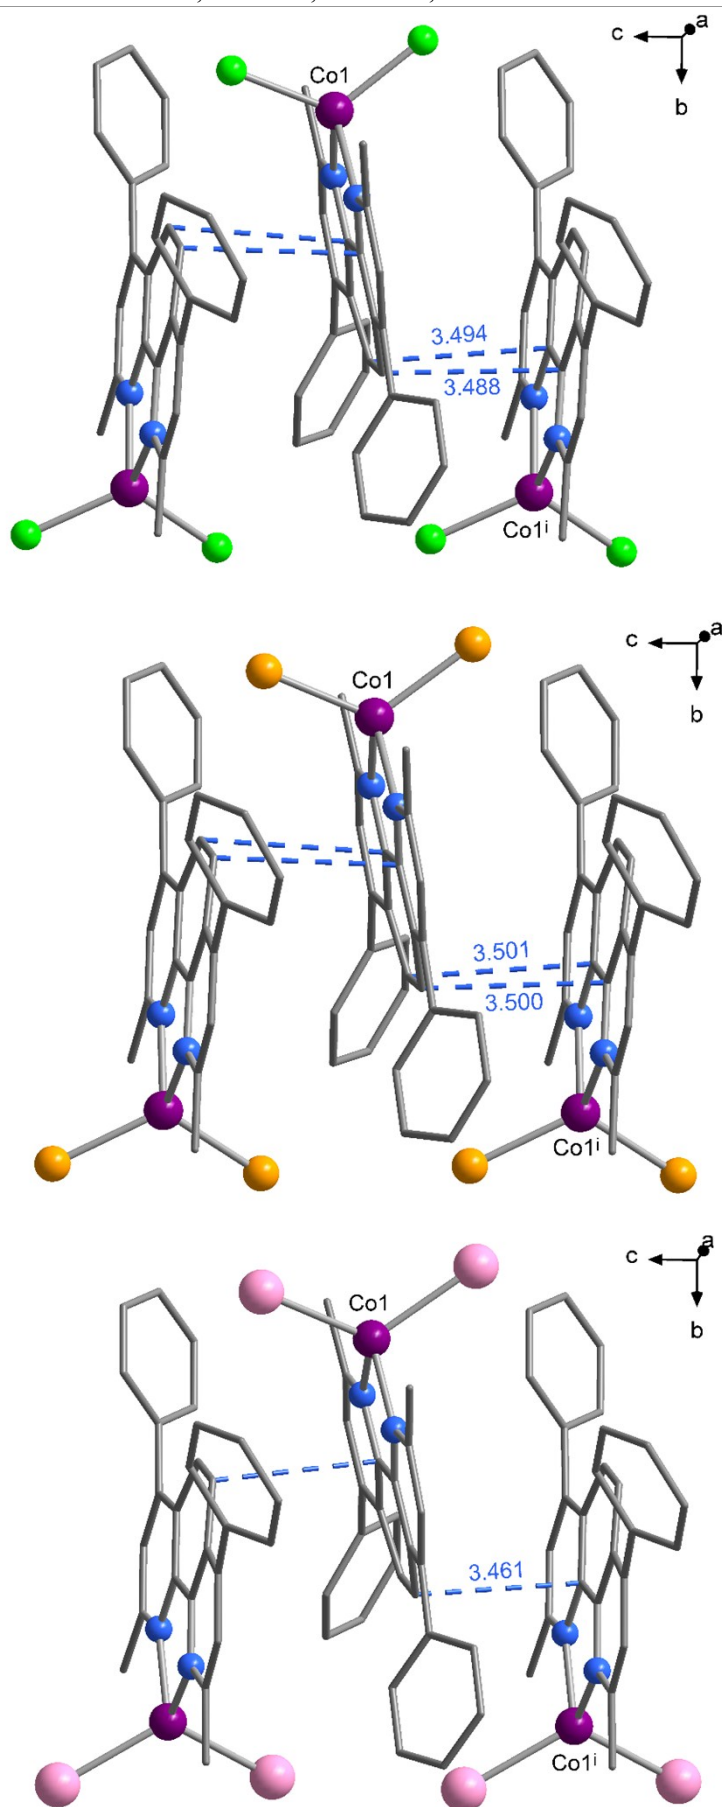

**Fig. S2** The shortest C...C contacts [ $\text{\AA}$ ] between carbon atoms of adjacent complex molecules present in the crystal structures of **1-3** (from top). Hydrogen atoms are omitted for clarity.

AC magnetic data

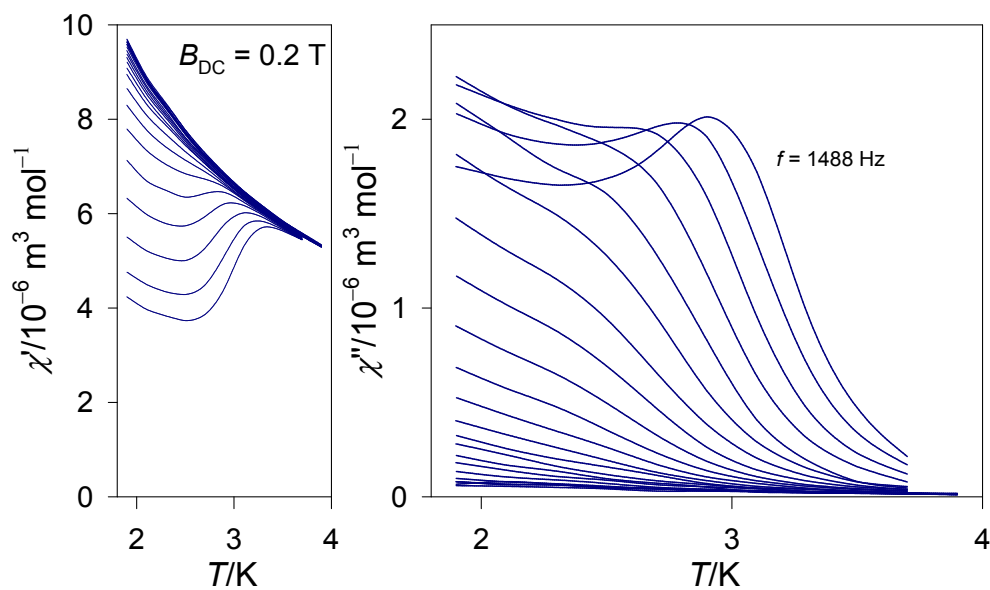

Fig. S3 Temperature dependence of the AC susceptibility components for **1**.

Table S8 Fitted parameters of the Debye model for **1** at  $B_{DC} = 0.2$  T

| $T/K$ | $R(\chi')/\%$ | $R(\chi'')/\%$ | $\chi_s$ | $\chi_{T1}$ | $\alpha_1$ | $\tau_1 / 10^{-3}$ s |
|-------|---------------|----------------|----------|-------------|------------|----------------------|
| 1.9   | 0.57          | 3.7            | 2.27(10) | 9.66(2)     | 0.32(1)    | 0.323(11)            |
| 2.1   | 0.46          | 3.3            | 2.22(7)  | 8.87(1)     | 0.29(1)    | 0.305(8)             |
| 2.3   | 0.50          | 3.2            | 2.28(7)  | 8.27(1)     | 0.25(1)    | 0.289(7)             |
| 2.5   | 0.51          | 3.0            | 2.14(7)  | 7.70(1)     | 0.22(1)    | 0.236(6)             |
| 2.7   | 0.57          | 3.6            | 1.99(9)  | 7.21(1)     | 0.18(1)    | 0.169(6)             |
| 2.9   | 0.63          | 4.0            | 1.77(15) | 6.79(1)     | 0.13(1)    | 0.0996(50)           |
| 3.1   | 0.75          | 4.7            | 1.50     | 6.38(1)     | 0.09(1)    | 0.0480(10)           |
